# Supplementary material
Source: Springer Nature journal article supplement (https://www.springermedizin.de/resource/supplementary/12882_2012_366_MOESM3_ESM.pdf/9453486)
Supplement: MOESM3 [file 9453486]

**Supplementary Table S3. Patient demographics and baseline characteristics by completer status, all countries.**

|                           | Completed<br>Follow-up Period<br>(N = 4873) | Did Not Complete<br>Follow-up Period<br>(N = 1496) | Total<br>(N = 6369) |
|---------------------------|---------------------------------------------|----------------------------------------------------|---------------------|
| Males, n (%)              | 2753 (56)                                   | 877 (59)                                           | 3630 (57)           |
| Age, years                |                                             |                                                    |                     |
| n                         | 4873                                        | 1496                                               | 6369                |
| Mean                      | 62.46                                       | 64.82                                              | 63.02               |
| SD                        | 14.65                                       | 14.72                                              | 14.70               |
| Median                    | 65.00                                       | 67.00                                              | 65.00               |
| Q1, Q3                    | 53.00, 74.00                                | 56.00, 76.00                                       | 53.00, 74.00        |
| Min, Max                  | 18.0, 101.0                                 | 18.0, 97.0                                         | 18.0, 101.0         |
| History, n (%)            |                                             |                                                    |                     |
| Diabetes                  | 1131 (23)                                   | 450 (30)                                           | 1581 (25)           |
| CVD                       | 3722 (76)                                   | 1242 (83)                                          | 4964 (78)           |
| Cancer                    | 273 (6)                                     | 111 (7)                                            | 384 (6)             |
| CKD aetiology, n (%)      |                                             |                                                    |                     |
| Hypertension/vascular     | 685 (14)                                    | 201 (13)                                           | 886 (14)            |
| Glomerulonephritis        | 810 (17)                                    | 258 (17)                                           | 1068 (17)           |
| Diabetes                  | 653 (13)                                    | 238 (16)                                           | 891 (14)            |
| Tubulo-interstitial       | 684 (14)                                    | 192 (13)                                           | 876 (14)            |
| Polycystic kidney disease | 302 (6)                                     | 81 (5)                                             | 383 (6)             |
| Miscellaneous             | 199 (4)                                     | 51 (3)                                             | 250 (4)             |
| Unknown                   | 1143 (23)                                   | 353 (24)                                           | 1496 (23)           |
| Missing                   | 397 (8)                                     | 122 (8)                                            | 519 (8)             |
| iPTH, pg/mL               |                                             |                                                    |                     |
| n                         | 4873                                        | 1496                                               | 6369                |
| Mean                      | 299.46                                      | 312.21                                             | 302.45              |
| SD                        | 338.97                                      | 369.09                                             | 346.29              |
| Median                    | 192.10                                      | 193.83                                             | 192.90              |
| Q1, Q3                    | 96.05, 369.50                               | 88.74, 379.50                                      | 94.00, 372.00       |
| Min, Max                  | 1.7, 2985.7                                 | 1.0, 2824.8                                        | 1.0, 2985.7         |
| Total calcium, mmol/L     |                                             |                                                    |                     |
| n                         | 4776                                        | 1424                                               | 6200                |
| Mean                      | 2.28                                        | 2.27                                               | 2.28                |
| SD                        | 0.20                                        | 0.20                                               | 0.20                |
| Median                    | 2.26                                        | 2.26                                               | 2.26                |
| Q1, Q3                    | 2.16, 2.38                                  | 2.15, 2.38                                         | 2.15, 2.38          |
| Min, Max                  | 1.3, 3.7                                    | 1.6, 3.6                                           | 1.3, 3.7            |
| Phosphate, mmol/L         |                                             |                                                    |                     |
| n                         | 4706                                        | 1415                                               | 6121                |
| Mean                      | 1.53                                        | 1.51                                               | 1.53                |
| SD                        | 0.39                                        | 0.42                                               | 0.40                |
| Median                    | 1.50                                        | 1.47                                               | 1.49                |
| Q1, Q3                    | 1.26, 1.77                                  | 1.22, 1.78                                         | 1.25, 1.77          |
| Min, Max                  | 0.5, 2.9                                    | 0.5, 2.9                                           | 0.5, 2.9            |
| CRP, mg/L                 |                                             |                                                    |                     |
| n                         | 3433                                        | 1063                                               | 4496                |
| Mean                      | 11.77                                       | 14.43                                              | 12.40               |
| SD                        | 15.73                                       | 18.17                                              | 16.38               |
| Median                    | 6.67                                        | 8.00                                               | 7.00                |
| Q1, Q3                    | 3.00, 14.00                                 | 3.53, 18.40                                        | 3.10, 14.88         |
| Min, Max                  | 0.1, 171.0                                  | 0.1, 170.0                                         | 0.1, 171.0          |

|                                             | Completed<br>Follow-up Period<br>(N = 4873) | Did Not Complete<br>Follow-up Period<br>(N = 1496) | Total<br>(N = 6369) |
|---------------------------------------------|---------------------------------------------|----------------------------------------------------|---------------------|
| <b>Serum albumin, g/dL</b>                  |                                             |                                                    |                     |
| n                                           | 4449                                        | 1304                                               | 5753                |
| Mean                                        | 3.94                                        | 3.84                                               | 3.92                |
| SD                                          | 0.48                                        | 0.56                                               | 0.50                |
| Median                                      | 3.95                                        | 3.87                                               | 3.92                |
| Q1, Q3                                      | 3.69, 4.19                                  | 3.56, 4.13                                         | 3.65, 4.17          |
| Min, Max                                    | 2.1, 6.6                                    | 1.6, 7.0                                           | 1.6, 7.0            |
| <b>Haemoglobin, g/dL</b>                    |                                             |                                                    |                     |
| n                                           | 4840                                        | 1468                                               | 6308                |
| Mean                                        | 11.54                                       | 11.49                                              | 11.53               |
| SD                                          | 1.41                                        | 1.49                                               | 1.43                |
| Median                                      | 11.56                                       | 11.50                                              | 11.53               |
| Q1, Q3                                      | 10.63, 12.46                                | 10.55, 12.50                                       | 10.60, 12.47        |
| Min, Max                                    | 5.5, 16.8                                   | 7.2, 15.8                                          | 5.5, 16.8           |
| <b>Ferritin, µg/L</b>                       |                                             |                                                    |                     |
| n                                           | 4615                                        | 1408                                               | 6023                |
| Mean                                        | 527.27                                      | 537.86                                             | 529.74              |
| SD                                          | 504.85                                      | 478.07                                             | 498.70              |
| Median                                      | 400.00                                      | 409.83                                             | 402.27              |
| Q1, Q3                                      | 204.00, 695.00                              | 220.00, 729.00                                     | 207.20, 702.50      |
| Min, Max                                    | 2.3, 8241.0                                 | 7.0, 4208.4                                        | 2.3, 8241.0         |
| <b>Cholesterol, mmol/L</b>                  |                                             |                                                    |                     |
| n                                           | 3944                                        | 1158                                               | 5102                |
| Mean                                        | 4.43                                        | 4.33                                               | 4.40                |
| SD                                          | 1.10                                        | 1.13                                               | 1.11                |
| Median                                      | 4.32                                        | 4.20                                               | 4.30                |
| Q1, Q3                                      | 3.68, 5.06                                  | 3.52, 5.00                                         | 3.63, 5.05          |
| Min, Max                                    | 1.2, 12.0                                   | 1.3, 8.7                                           | 1.2, 12.0           |
| <b>Blood Leucocytes, no./mm<sup>3</sup></b> |                                             |                                                    |                     |
| n                                           | 3978                                        | 1309                                               | 5287                |
| Mean                                        | 6879.2                                      | 7098.4                                             | 6933.5              |
| SD                                          | 2135.4                                      | 2259.7                                             | 2168.7              |
| Median                                      | 6725.8                                      | 6900.0                                             | 6766.7              |
| Q1, Q3                                      | 5550.0, 8033.3                              | 5600.0, 8320.0                                     | 5566.7, 8116.7      |
| Min, Max                                    | 122, 24600                                  | 300, 20420                                         | 122, 24600          |
| <b>Dialysis vintage*, months</b>            |                                             |                                                    |                     |
| n                                           | 4873                                        | 1496                                               | 6369                |
| Mean                                        | 45.389                                      | 45.997                                             | 45.532              |
| SD                                          | 55.297                                      | 58.380                                             | 56.032              |
| Median                                      | 26.908                                      | 27.663                                             | 27.203              |
| Q1, Q3                                      | 5.355, 62.357                               | 7.901, 61.569                                      | 6.045, 62.193       |
| Min, Max                                    | 0.03, 476.65                                | 0.03, 834.79                                       | 0.03, 834.79        |

CKD, chronic kidney disease; CRP, C-reactive protein; CVD, cardiovascular disease; iPTH, intact parathyroid hormone; SHPT, secondary hyperparathyroidism

\*Calculated from initiation of dialysis to the start of the 3-month exposure period.
